# Supplementary material
Source: PubMed Central journal article supplement (PMC5338662)
Supplement: supp_pp.16.01933_PP2016-01380D_Supplemental_Figures.pdf [file supp_pp.16.01933_PP2016-01380D_Supplemental_Figures.pdf]

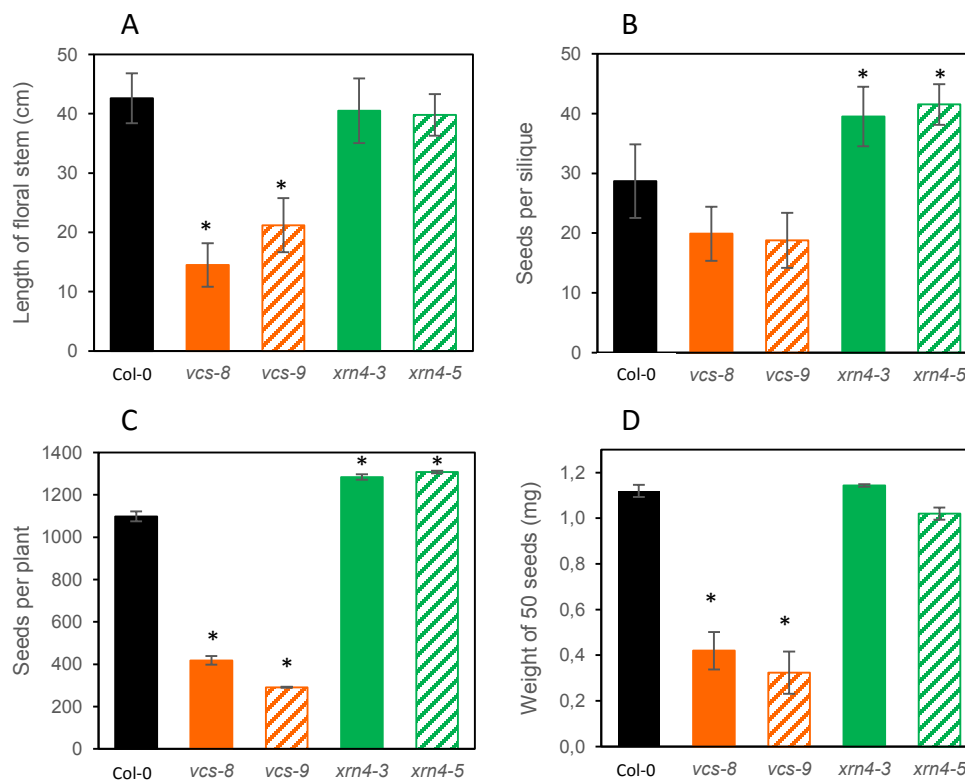

**Supplemental Figure 1.** Phenotypic Characterization of Growth and Seed Production of Col-0, *xrn4-3*, *xrn4-5*, *vcs-8* and *vcs-9* Mutant Plants Grown at 22°C.

(A) Floral stem measurements. Means  $\pm$  SE of 10 plants. (B) Number of seeds per silique Means  $\pm$  SE of 10 siliques. (C) Number of seeds per plant = number of siliques per plant  $\times$  number of seeds per silique. (D) weight of 50 seeds. Means  $\pm$  SE of 3 biological replicates. Asterisks indicate a significant difference with the wild type (Anova test and Newman-Keuls Test,  $p=0.05$ ).

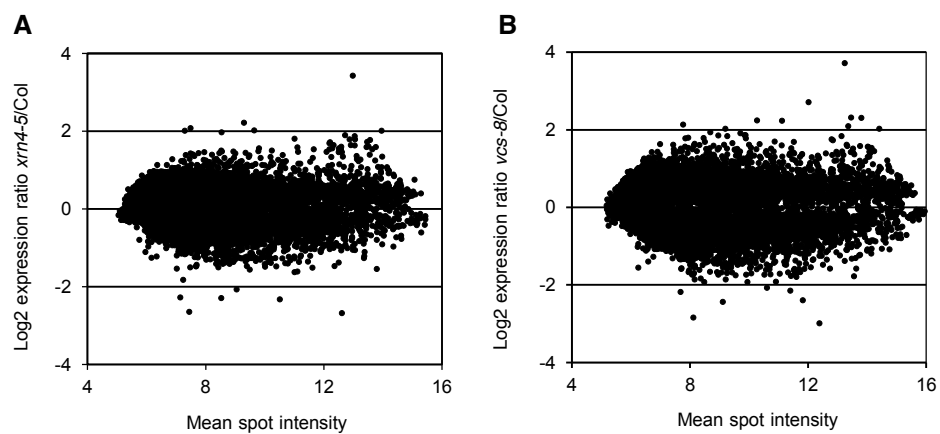

**Supplemental Figure 2.** MA Plot of Microarray Data of Ratios of Expression between *xrn4-5* Mutant and Col-0 (A) or *vcs-8* Mutant and Col-0 (B) from Seeds after 24 h of Imbibition at 25 °C. Data represented are  $\text{Log}_2(\text{expression ratio of } xrn4-5 \text{ or } vcs-8 \text{ seeds} / \text{expression ratio of Col-0 seeds})$ . Positive values of  $\text{log}_2(xrn4-5/\text{Col-0})$  and  $\text{log}_2(vcs-8/\text{Col-0})$  correspond to transcripts more expressed in *xrn4-5* and *vcs-8* mutant respectively, negative values correspond to transcripts more expressed in Col-0 seeds.

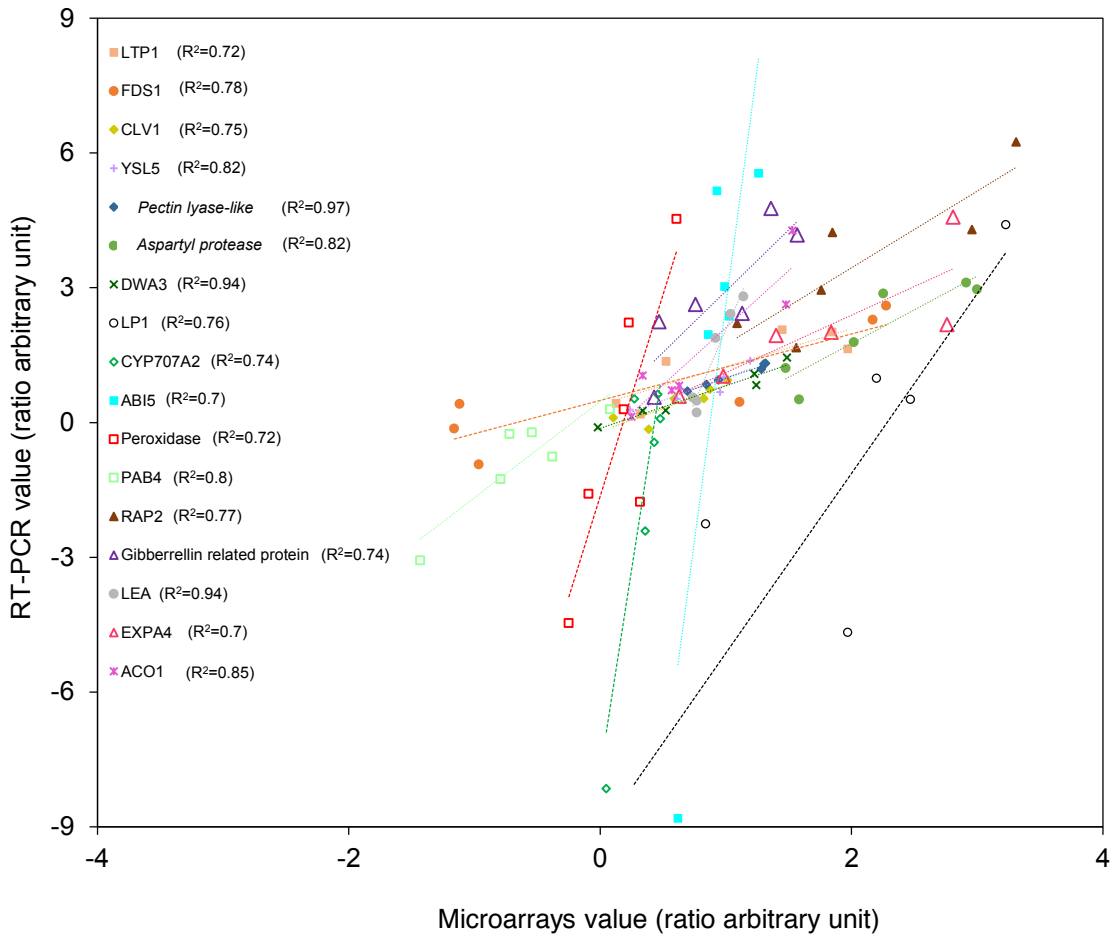

**Supplemental Figure 3.** Validation of Microarrays Results. Scatterplot showing correlations between microarray results (x-axis) and qRT-PCR experiments (y-axis) on a set of 17 genes: *LTP1* (At1g62500), *FDS1* (At4g25100), *PXL1* (At1g08590), *YSL5* (At3g17650), *pectin lyase-like* (At3g62110), *Aspartyl protease* (At1g66180), *DWA3* (At1g61210), *LP1* (At1g18250), *CYP707A2* (At2g29090), *ABI5* (At2g36270), *peroxidase* (At1g05240), *PAB4* (At2g23350), *RAP2* (At1g22190), *Gibberellin-regulated protein* (At2g14900), *LEA* (At3g0248), *EXP4* (At2g39700) and *ACO1* (At2g19590) genes (A). The *UBQ5* (At3g62250) and *At4g12590* genes were used as reference genes. Regression lines are drawn for each gene and the  $R^2$  values corresponding are indicated within the graph. For each point of qRT-PCR, ratios of  $\log_2$  (abundance) ND/D were calculated to compare with microarray data. For both methods 3 independent biological samples were used.

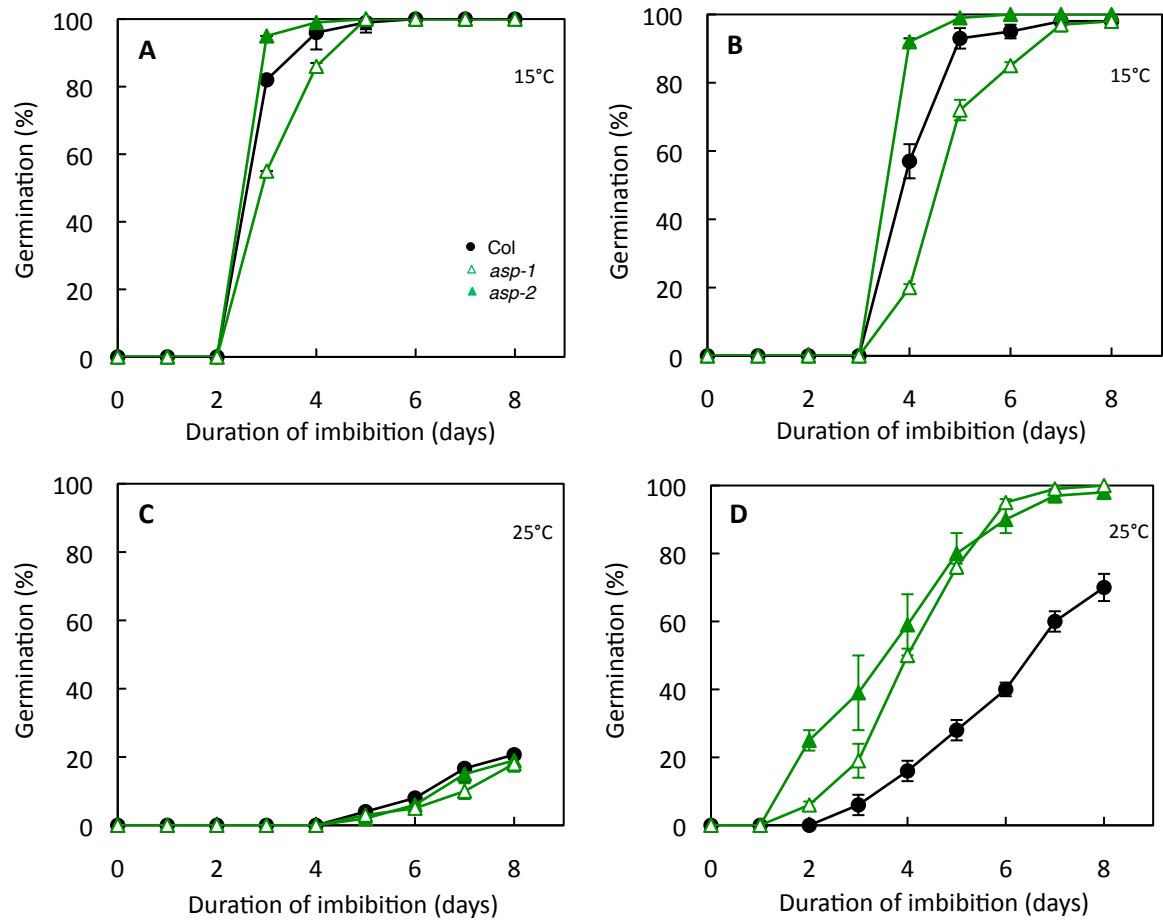

**Supplemental Figure 4.** Effect of ABA and GA on germination of seeds of *asp* mutants. Germination of freshly harvested seeds of Col-0 (closed circles), *asp-1* (open triangles) and *asp-2* (closed triangles) in darkness at 15°C on water (A) or in the presence of ABA 10<sup>-6</sup> M (B) and at 25°C on water (C) or in the presence of GA<sub>3</sub> 5.10<sup>-4</sup> M (D). Means ± SD of triplicate experiments are shown.
