# Supplementary material
Source: PubMed Central journal article supplement (PMC5338662)
Supplement: supp_pp.16.01933_PP2016-01380D_Supplemental_Tables.pdf [file supp_pp.16.01933_PP2016-01380D_Supplemental_Tables.pdf]

1 **Supplemental Table 1.** T-DNA Mutant Lines Used in the Study. The AGI for each gene was  
 2 determined by TAIR. T-DNA insertion lines in Col background were kindly given by, (a), Dr  
 3 Hervé Vaucheret (Institut Jean-Pierre Bourgin, INRA, Versailles, France), (b), Dr Pascal  
 4 Genschik (Institut de Biologie Moléculaire des Plantes, Strasbourg, France) or obtained from  
 5 the Nottingham Arabidopsis Stock Centre, (c).

| Gene                                  | Mutant        | AGI       | T-DNA<br>insertion | Source |
|---------------------------------------|---------------|-----------|--------------------|--------|
| <i>EXORIBONUCLEASE 4</i>              | <i>xrn4-5</i> | At1g54490 | Salk_681_E01       | a      |
|                                       | <i>xrn4-3</i> |           | Salk-014209        | b      |
| <i>VARICOSE</i>                       | <i>vcs-8</i>  | At3g13300 | Salk_1257_H12      | a      |
|                                       | <i>vcs-9</i>  |           | Salk_218_E01       |        |
| <i>putative ASPARTYL<br/>PROTEASE</i> | <i>asp-1</i>  | At1g66180 | Salk_025595        | c      |
|                                       | <i>asp-2</i>  |           | Salk_045167        |        |
| <i>PECTIN LYASE-LIKE</i>              | <i>ply-1</i>  | At3g62110 | Salk_017839        | c      |
|                                       | <i>ply-2</i>  |           | Salk_031921        |        |
| <i>DWD HYPERSENSITIVE<br/>TO ABA3</i> | <i>dwa3-1</i> | At1g61210 | Salk_092993        | c      |
|                                       | <i>dwa3-2</i> |           | Salk_058391        |        |
| <i>YELLOW STIPE LIKE 5</i>            | <i>ysl5-1</i> | At3g17650 | Salk_105596        | c      |
|                                       | <i>ysl5-2</i> |           | Salk_058656        |        |

23 **Supplemental Table 2.** Sequences of Primers Used for qRT-PCR Experiments. The AGI for  
 24 each gene was determined by TAIR and the sequence of primer by Primer3 except *NCED6*  
 25 primers that were from Seo et al. (2004).

26

| Genes                                | AGI       | Primer sequences                                               |
|--------------------------------------|-----------|----------------------------------------------------------------|
| <i>ABI5</i>                          | At2g36270 | F: TTGAAGTCAAGGGCACAACC<br>R: CGGGTTCCTCATCAATGTCC             |
| <i>ACO1</i>                          | At2g19590 | F: CTCAGCAAGACGATGGATGAA<br>R: CGTGGGCATTCTGGGTATTTAG          |
| <i>Aspartyl protease</i>             | At1g66180 | F: CACTACTCTTACTTCTACGCTGATGG<br>R: CCTATCATCAGAAGACTCAGTAGCAC |
| <i>CYP707A2</i>                      | At2g29090 | F: GGCACCAAACCTTACACG<br>R: TCTCCAATCACTTCCCATCTG              |
| <i>DWA3</i>                          | At1g61210 | F: GATCTCTTCTCATATCCCTCCCTTG<br>R: GAATCGAATCTGTAGCTTCCGGAATC  |
| <i>EXP4</i>                          | At2g39700 | F: TCGCTATTCCTCCTCCTTTT<br>R: CCCTCATTTCCCCCTTTATC             |
| <i>FDS1</i>                          | At4g25100 | F: GAAAACATCACAGAGCTTACGTGG<br>R: GTAAGTGCTGTGGATAATGTGCTC     |
| <i>Ga20ox4</i>                       | At5g64100 | F: GCGAGACGACAAGGAAGACA<br>R: TCGGGATACGCTCTCTCACC             |
| <i>Ga2ox2</i>                        | At1g30040 | F: TGTTGGAGATGGTTGCCGAA<br>R: CCATCTTCTCCGCCTTTC               |
| <i>Ga3ox1</i>                        | At1g15550 | F: TTGGGGTCAGCGAAGAAGA<br>R: CAGAATGGTTAGGAGGGTGGA             |
| <i>Gibberellin-regulated protein</i> | At2g14900 | F: GGGGACTAAAGAAAGCCAAAG<br>R: AGCCGAAGCAAGAGATGAA             |
| <i>Pectin lyase-like</i>             | At3g62110 | F: GAACTCTACTGGTCTGATCATCTCC<br>R: GAACTCTACTGGTCTGATCATCTCC   |
| <i>LEA</i>                           | At3g0248  | F: GGACAACAAATGAAGGAGAAGG<br>R: AATGGACGCAAGGAAACAAC           |
| <i>LPI</i>                           | At1g18250 | F: AGCGCCGGTCAAACTTACT                                         |

|                   |           |                                                                |
|-------------------|-----------|----------------------------------------------------------------|
|                   |           | R: GGCCAGATCTGTCTGAAGGTG                                       |
| <i>LTP</i>        | At1g62500 | F: CAAGAGTCACGGGTCACATTTAAG<br>R: CCAAAACTCTCGAACCCATTATCG     |
| <i>MYB33</i>      | At5g06100 | F: GGAGTTGGGTCTTGTCTTGG<br>R: AACGGCTCTAATCCAATCCA             |
| <i>MYB65</i>      | At3g11440 | F: GGTCATCATCAGGTCAAGCA<br>R: TTACAGCGACCAAACAGGAG             |
| <i>NCED6</i>      | At3g24220 | F: CGTTATTCCTATGGAGCAGAAATCG<br>R: GGAGCGAAGTTACCTGATAATTGAA   |
| <i>NCED9</i>      | At1g78390 | F: TCCCCTGCTATGTTTCTTCC<br>R: AGACGGTGGTTTGAATGTCG             |
| <i>PAB4</i>       | At2g23350 | F: ATTTGTTGCCTTCTCTGCTG<br>R: CCTCCTTCTTCTTTCCTCTG             |
| <i>Peroxidase</i> | At5g64100 | F: TTGAGAAGGCTTGTCTCTG<br>R: GCGAAGTCTTGCTTCTGCTT              |
| <i>RAP2</i>       | At1g22190 | F: GTTCTCTTACCCGCTCCAA<br>R: CCACCCATTTTCCCCAGT                |
| <b>CLV1</b>       | At1g75820 | F: GGAGTTAATAGCTGGGAAGAAACCTG<br>R: ACCCACCTAACTATATCCACTCCTTC |
| <i>SLP2</i>       | At4g34980 | F: AAAATCGGGAATGTCATCAGC<br>R: CAACCAATCCTTTGGCTACG            |
| <i>UBQ5</i>       | At3g62250 | F: CTTGAAGACGGCCGTACCCTC<br>R: CGCTGAACCTTTCAAGATCCATCG        |
| <i>YSL5</i>       | At3g17650 | F: TAATACTTCCTCCACCATCTCTCCTC<br>R: CTCATGTTCCACTATCTGACGATCTC |
|                   | At4g12590 | F: GAGATGAAAATGCCATTGATGAC<br>R: GCACCCAGACTCTTTGATG           |

27

28

29

30
